# Supplementary material for: Surfactin Like Broad Spectrum Antimicrobial Lipopeptide Co-produced With Sublancin From Bacillus subtilis Strain A52: Dual Reservoir of Bioactives
Source: PubMed Central journal article supplement (PMC7300217; doi:10.3389/fmicb.2020.01167), 2020-06-11

**Surfactin like broad spectrum antimicrobial lipopeptide co-produced with sublancin from *Bacillus subtilis* strain A52: Dual reservoir of bioactives**

Deepika Sharma<sup>1</sup>, Shelley Sardul Singh<sup>1</sup>, Piyush Baidara<sup>1</sup>, Shikha Sharma<sup>1</sup>, Neeraj Khatri<sup>1</sup>, Vishakha Grover<sup>2</sup>, Prabhu B. Patil<sup>1</sup>, Suresh Korpole<sup>1\*</sup>

1. CSIR-Institute of Microbial Technology, Sector 39A, Chandigarh, India.
2. Dr. Harvansh Singh Judge Institute of Dental Sciences and Hospital, Panjab University, Chandigarh, India.

\*Correspondence: Suresh Korpole, CSIR-Institute of Microbial Technology, Chandigarh-160036, India, email: suresh@imtech.res.in

**Supplementary Table S1.** Effect of temperature, pH and proteases on sublancin like peptide and lipopeptide from strain A52.

| Treatment           | Reaction Duration/<br>Condition | Residual activity (%) |             |
|---------------------|---------------------------------|-----------------------|-------------|
|                     |                                 | Peptide               | Lipopeptide |
| Temperature<br>(°C) |                                 |                       |             |
| 37                  | 1h                              | 100                   | 100         |
| 50                  | 1h                              | 100                   | 100         |
| 60                  | 1h                              | 100                   | 100         |
| 70                  | 1h                              | 100                   | 100         |
| 80                  | 1h                              | 80.3                  | 100         |
| 100                 | 1h                              | 53.3                  | 100         |
| 121                 | 15 min (15 lbs)                 | 0.0                   | 89.0        |
| pH                  |                                 |                       |             |
| 2.0                 | 4h/ 25°C                        | Nil                   | Nil         |
| 4.0                 | 4h/ 25°C                        | 86.6                  | 100         |
| 6.0                 | 4h/ 25°C                        | 100                   | 100         |
| 7.0                 | 4h/ 25°C                        | 100                   | 100         |
| 8.0                 | 4h/ 25°C                        | 100                   | 100         |
| 10.0                | 4h/ 25°C                        | 93.3                  | 100         |
| 11.0                | 4h/ 25°C                        | Nil                   | 80          |
| 12.0                | 4h/ 25°C                        | Nil                   | Nil         |
| Enzymes             |                                 |                       |             |
| Proteinase k        | 6h/ 37°C                        | 93.3                  | 100         |
| Trypsin             | 6h/ 37°C                        | 100                   | 100         |
| Lipase              | 6h/ 37°C                        | ND                    | 100         |

ND = Not determined

**Supplementary Table S2.** Mean erythema score observed at end of 24, 48 and 72 h after application of lipopeptide containing emulgel.

| Test groups      | Erythema score (n=3) |     |     |     |
|------------------|----------------------|-----|-----|-----|
|                  | 0 h                  | 24h | 48h | 72h |
| Negative Control | 0                    | 0   | 0   | 0   |
| Positive Control | 0                    | 3   | 3   | 3   |
| A52 Emulgel      | 0                    | 0   | 0   | 0   |

**Supplementary Figure S1.** Mass determination of lipopeptide and surfactin by MALDI-MS. A) Lipopeptide isoform ion at  $m/z$  1064.5 Da and its sodium adduct  $m/z$  1087.5 Da from strain A52. B) Standard surfactin ions ( $m/z$  1035.22 Da) and sodium adduct ( $m/z$  1057.62 Da).

**A)**

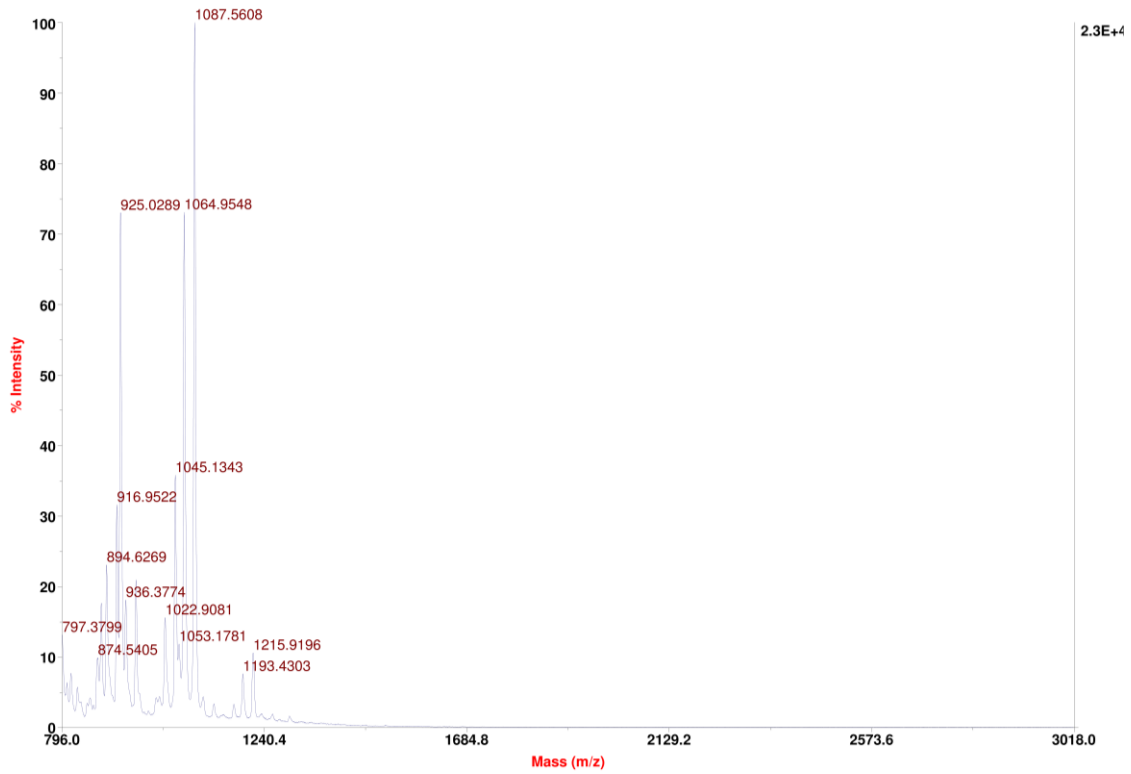

**B)**

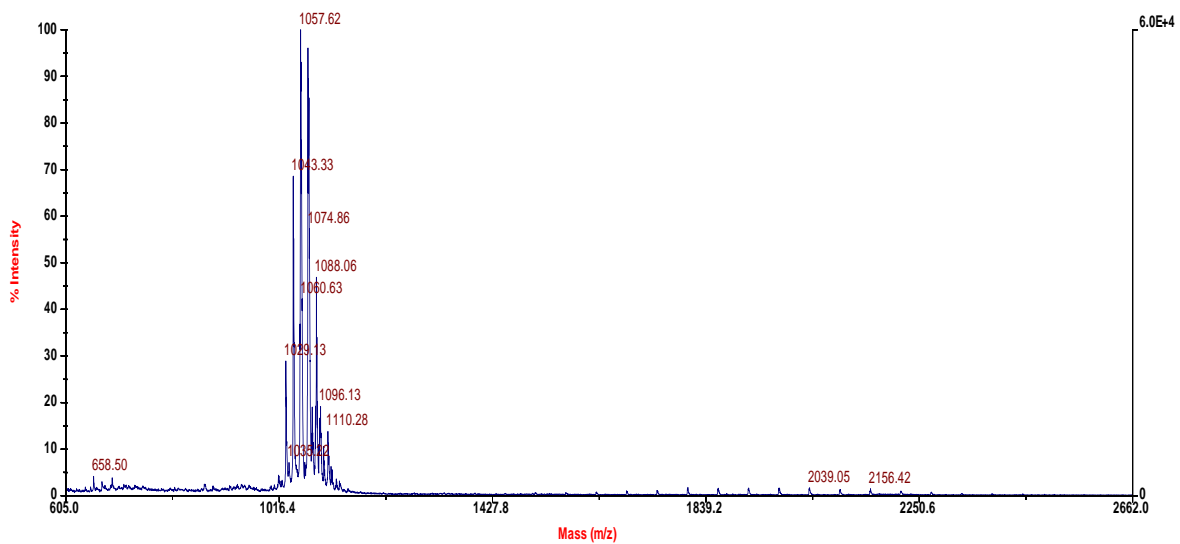

**Supplementary Figure S2.** Antifungal activity of lipopeptide from strain A52 against (a) *A. brassicicola* MTCC 2102 (b) *C. acutatum* MTCC 1037.

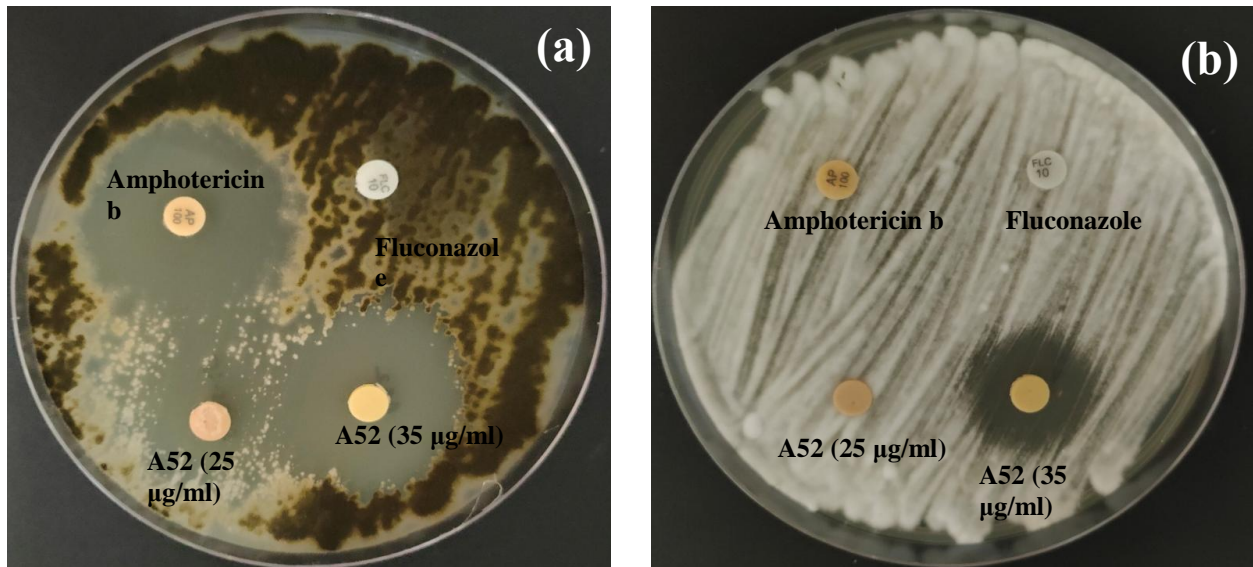

**Supplementary Figure S3.** Determination of antimicrobial activity of emulgel prepared using lipopeptide against (a) *M. luteus* MTCC 106 (b) *C. albicans* MTCC 183.

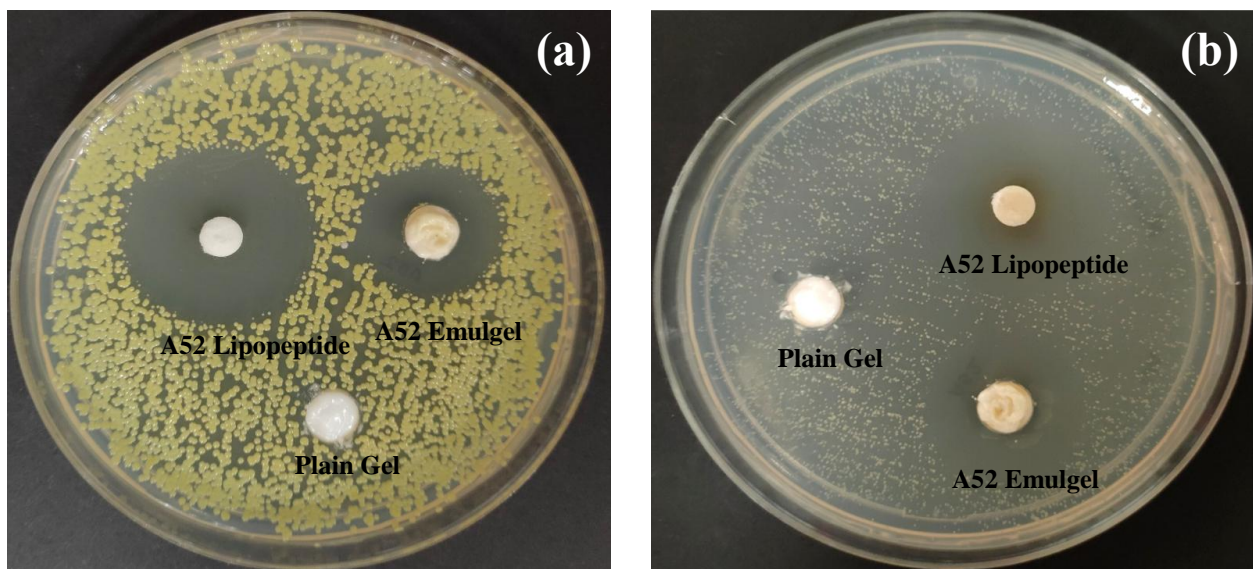

Supplement: Data_Sheet_1.pdf [file Data_Sheet_1.pdf]
